# Supplementary material for: Atomic charges in molecules defined by molecular real space partition into atomic subspaces
Source: Royal Society of Chemistry journal article supplement (doi:10.1039/d2cp05428k), 2023-01-01
Supplement: d2cp05428k1.pdf [file d2cp05428k1.pdf]

# Supporting Information

## Atomic Charges in Molecules Defined by Molecular Real Space Partition into Atomic Subspaces

Jian Zhao<sup>#,ab</sup>, Zun-Wei Zhu<sup>#,c</sup>, Dong-Xia Zhao<sup>\*,a</sup>, Zhong-Zhi Yang<sup>\*,a</sup>

\* Corresponding authors

# The two authors contributed equally to this work

<sup>a</sup> Dong-Xia Zhao and Zhong-Zhi Yang: School of Chemistry and Chemical Engineering,  
Liaoning Normal University, Dalian, Liaoning province, 116029, China

<sup>ab</sup> Jian Zhao: State Key Laboratory of Catalysis, Dalian Institute of Chemical Physics,  
Chinese Academy of Sciences, Dalian, Liaoning province, 116023, China

<sup>c</sup> Zun-Wei Zhu: School of Materials Science and Engineering, Anyang Institute of  
Technology, Anyang, Henan province, 455000, China

Email: zhaodxchem@lnnu.edu.cn; zzyang@lnnu.edu.cn

## 1. Dependence on the basis sets

### 1.1 HF molecule

Table S1. The H atomic charges (e) of HF molecule by PAEMQCT, QTAIM, Hirshfeld, Mulliken, NPA, APT, CHELPG, and MK population methods obtained from the CISD method with 19 different basis sets.

| Basis sets        | PAEMQCT | QTAIM  | Hirshfeld | NPA    | MK     | CHELPG | APT    | Mulliken |
|-------------------|---------|--------|-----------|--------|--------|--------|--------|----------|
| 6-31G             | 0.319   | 0.601  | 0.230     | 0.527  | 0.502  | 0.499  | 0.392  | 0.453    |
| 6-311G            | 0.330   | 0.597  | 0.228     | 0.512  | 0.509  | 0.506  | 0.392  | 0.462    |
| 6-31G(d)          | 0.327   | 0.690  | 0.230     | 0.540  | 0.442  | 0.435  | 0.388  | 0.494    |
| 6-311G(d)         | 0.338   | 0.649  | 0.236     | 0.516  | 0.485  | 0.480  | 0.396  | 0.487    |
| 6-31+G(d)         | 0.332   | 0.656  | 0.217     | 0.566  | 0.467  | 0.462  | 0.424  | 0.551    |
| 6-311+G(d)        | 0.345   | 0.656  | 0.227     | 0.532  | 0.497  | 0.492  | 0.415  | 0.423    |
| 6-31 G(d,p)       | 0.315   | 0.711  | 0.225     | 0.541  | 0.432  | 0.426  | 0.376  | 0.373    |
| 6-311G(d,p)       | 0.319   | 0.701  | 0.222     | 0.518  | 0.439  | 0.434  | 0.393  | 0.299    |
| 6-31+G(d,p)       | 0.325   | 0.724  | 0.212     | 0.568  | 0.457  | 0.452  | 0.414  | 0.401    |
| 6-311+G(d,p)      | 0.322   | 0.707  | 0.212     | 0.534  | 0.451  | 0.447  | 0.417  | 0.278    |
| 6-311++G(d,p)     | 0.321   | 0.708  | 0.211     | 0.532  | 0.451  | 0.447  | 0.417  | 0.283    |
| 6-311+G(2d,2p)    | 0.326   | 0.736  | 0.210     | 0.539  | 0.434  | 0.428  | 0.400  | 0.344    |
| 6-311+G(2df,2pd)  | 0.328   | 0.752  | 0.211     | 0.539  | 0.431  | 0.425  | 0.401  | 0.279    |
| 6-31++G(3df,3pd)  | 0.330   | 0.742  | 0.210     | 0.533  | 0.421  | 0.414  | 0.390  | 0.510    |
| 6-311++G(3df,3pd) | 0.328   | 0.752  | 0.210     | 0.536  | 0.427  | 0.421  | 0.393  | 0.357    |
| cc-pVDZ           | 0.309   | 0.723  | 0.221     | 0.517  | 0.423  | 0.418  | 0.388  | 0.215    |
| cc-pVTZ           | 0.333   | 0.743  | 0.217     | 0.531  | 0.423  | 0.417  | 0.389  | 0.323    |
| aug-cc-pVDZ       | 0.326   | 0.720  | 0.201     | 0.552  | 0.419  | 0.413  | 0.385  | 0.273    |
| aug-cc-pVTZ       | 0.329   | 0.753  | 0.208     | 0.540  | 0.420  | 0.414  | 0.390  | 0.348    |
| Average           | 0.3264  | 0.7011 | 0.2178    | 0.5354 | 0.4489 | 0.4437 | 0.3979 | 0.3765   |

### 1.2. H<sub>2</sub>O molecule

Table S2. The H atomic charges (e) of H<sub>2</sub>O molecule by PAEMQCT, QTAIM, Hirshfeld, Mulliken, NPA, APT, CHELPG, and MK population methods obtained from the CISD method with 19 different basis sets.

| Basis sets | PAEMQCT | QTAIM | Hirshfeld | NPA   | MK    | CHELPG | APT   | Mulliken |
|------------|---------|-------|-----------|-------|-------|--------|-------|----------|
| 6-31G      | 0.218   | 0.472 | 0.168     | 0.368 | 0.458 | 0.264  | 0.456 | 0.450    |
| 6-311G     | 0.235   | 0.453 | 0.168     | 0.371 | 0.423 | 0.258  | 0.457 | 0.451    |
| 6-31G(d)   | 0.221   | 0.560 | 0.170     | 0.413 | 0.466 | 0.272  | 0.396 | 0.386    |
| 6-311G(d)  | 0.241   | 0.525 | 0.174     | 0.405 | 0.427 | 0.263  | 0.422 | 0.413    |

|                   |       |       |       |       |       |       |       |       |
|-------------------|-------|-------|-------|-------|-------|-------|-------|-------|
| 6-31+G(d)         | 0.231 | 0.569 | 0.165 | 0.473 | 0.485 | 0.297 | 0.419 | 0.410 |
| 6-311+G(d)        | 0.239 | 0.534 | 0.169 | 0.372 | 0.440 | 0.281 | 0.438 | 0.430 |
| 6-31G(d,p)        | 0.219 | 0.574 | 0.167 | 0.319 | 0.467 | 0.259 | 0.382 | 0.373 |
| 6-311G(d,p)       | 0.229 | 0.548 | 0.166 | 0.233 | 0.427 | 0.251 | 0.377 | 0.368 |
| 6-31+G(d,p)       | 0.226 | 0.585 | 0.162 | 0.350 | 0.486 | 0.286 | 0.405 | 0.396 |
| 6-311+G(d,p)      | 0.226 | 0.560 | 0.160 | 0.247 | 0.442 | 0.274 | 0.392 | 0.384 |
| 6-311++G(d,p)     | 0.228 | 0.560 | 0.160 | 0.245 | 0.441 | 0.273 | 0.392 | 0.383 |
| 6-311+G(2d,2p)    | 0.228 | 0.571 | 0.157 | 0.224 | 0.454 | 0.264 | 0.362 | 0.351 |
| 6-311+G(2df,2pd)  | 0.229 | 0.598 | 0.159 | 0.169 | 0.456 | 0.267 | 0.360 | 0.349 |
| 6-31++G(3df,3pd)  | 0.229 | 0.600 | 0.157 | 0.458 | 0.455 | 0.260 | 0.348 | 0.335 |
| 6-311++G(3df,3pd) | 0.229 | 0.596 | 0.158 | 0.449 | 0.455 | 0.258 | 0.352 | 0.340 |
| cc-pVDZ           | 0.215 | 0.593 | 0.165 | 0.138 | 0.437 | 0.246 | 0.357 | 0.348 |
| cc-pVTZ           | 0.234 | 0.589 | 0.164 | 0.232 | 0.448 | 0.254 | 0.355 | 0.343 |
| aug-cc-pVDZ       | 0.221 | 0.593 | 0.153 | 0.113 | 0.472 | 0.252 | 0.347 | 0.335 |
| aug-cc-pVTZ       | 0.225 | 0.601 | 0.159 | 0.211 | 0.457 | 0.258 | 0.347 | 0.334 |
| Average           | 0.228 | 0.562 | 0.163 | 0.305 | 0.452 | 0.265 | 0.388 | 0.378 |

## 2. The linear correlation plots between $D_{pb}$ for PAEMQCT and electron density at bond critical point for QTAIM

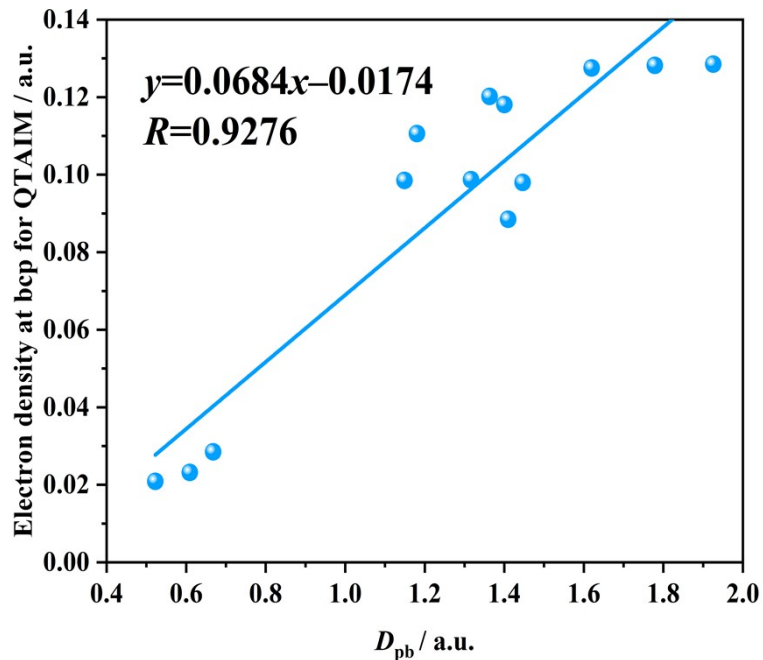

Figure S1. Linear correlation plot between  $D_{pb}$  for PAEMQCT and electron density at bcp for QTAIM for the molecules containing Si atom, all units are a.u.

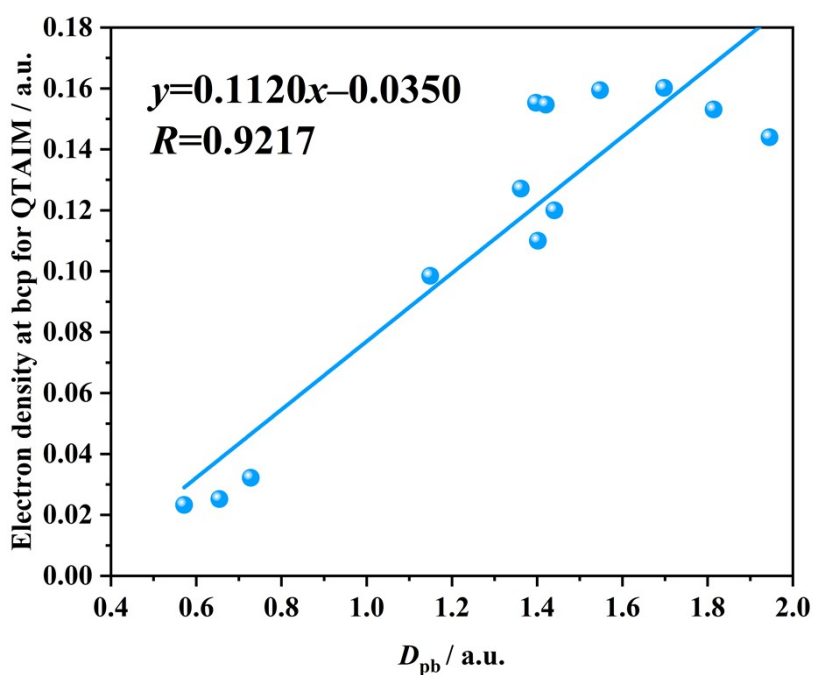

Figure S2. Linear correlation plot between  $D_{pb}$  for PAEMQCT and electron density at bcp for QTAIM for the molecules containing P atom, all units are a.u.

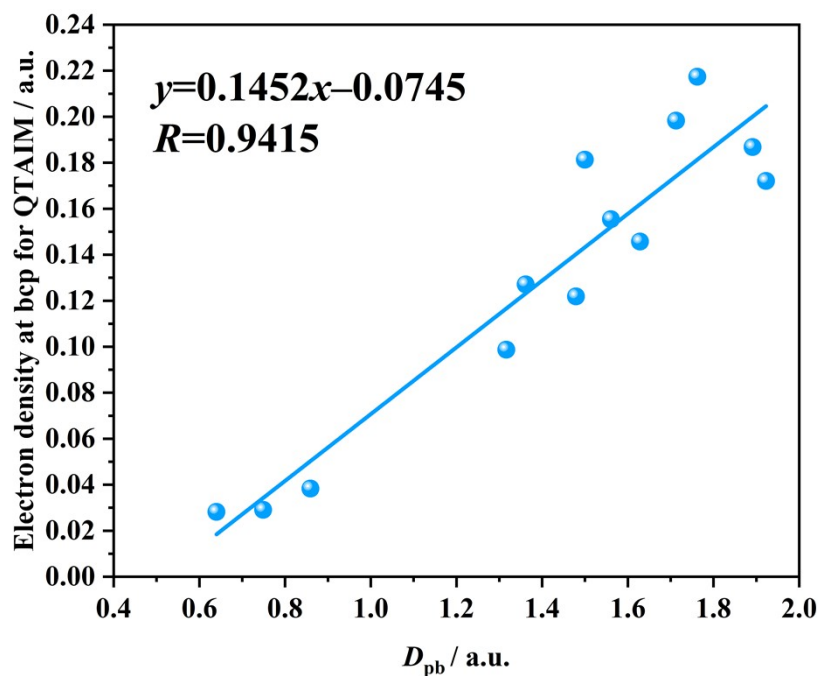

Figure S3. Linear correlation plot between  $D_{pb}$  for PAEMQCT and electron density at bcp for QTAIM for the molecules containing S atom, all units are a.u.

### 3. Polyatomic molecules

**Table S3.** Atomic charges (e) of polyatomic molecules containing Si, P, and S atoms obtained by PAEMQCT, QTAIM, Hirshfeld, Mulliken, NPA, APT, CHELPG, and MK population methods at the CISD/6-311++G(d,p) level of theory.

| Molecule                                                                                                                | Atom | PAEMQCT | QTAIM  | Hirshfeld | Mulliken | NPA    | APT    | CHELPG | MK     |
|-------------------------------------------------------------------------------------------------------------------------|------|---------|--------|-----------|----------|--------|--------|--------|--------|
| SiH <sub>4</sub>                                                                                                        | Si1  | 0.564   | 2.853  | 0.336     | 0.705    | 0.751  | 1.098  | 0.687  | 0.791  |
|                                                                                                                         | H2   | -0.141  | -0.713 | -0.084    | -0.176   | -0.188 | -0.274 | -0.172 | -0.198 |
|                                                                                                                         | H3   | -0.141  | -0.713 | -0.084    | -0.176   | -0.188 | -0.274 | -0.172 | -0.197 |
|                                                                                                                         | H4   | -0.141  | -0.713 | -0.084    | -0.176   | -0.188 | -0.274 | -0.172 | -0.197 |
|                                                                                                                         | H5   | -0.141  | -0.713 | -0.084    | -0.176   | -0.188 | -0.274 | -0.172 | -0.198 |
| BH <sub>2</sub> SiH <sub>3</sub><br>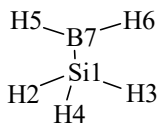   | Si1  | 0.492   | 2.756  | 0.264     | 0.671    | 0.587  | 0.872  | 0.276  | 0.352  |
|                                                                                                                         | H2   | -0.151  | -0.720 | -0.088    | -0.174   | -0.178 | -0.277 | -0.117 | -0.133 |
|                                                                                                                         | H3   | -0.151  | -0.720 | -0.088    | -0.174   | -0.178 | -0.277 | -0.117 | -0.133 |
|                                                                                                                         | H4   | -0.147  | -0.705 | -0.082    | -0.175   | -0.168 | -0.264 | -0.113 | -0.124 |
|                                                                                                                         | H5   | -0.111  | -0.657 | -0.074    | -0.036   | -0.106 | -0.173 | -0.196 | -0.167 |
|                                                                                                                         | H6   | -0.111  | -0.657 | -0.074    | -0.036   | -0.106 | -0.173 | -0.196 | -0.167 |
|                                                                                                                         | B7   | 0.179   | 0.704  | 0.142     | -0.077   | 0.149  | 0.290  | 0.463  | 0.371  |
| CH <sub>3</sub> SiH <sub>3</sub><br> | Si1  | 0.633   | 2.903  | 0.360     | 0.811    | 1.004  | 1.202  | 0.769  | 0.892  |
|                                                                                                                         | H2   | -0.160  | -0.730 | -0.094    | -0.178   | -0.206 | -0.304 | -0.207 | -0.234 |
|                                                                                                                         | H3   | -0.160  | -0.730 | -0.094    | -0.178   | -0.206 | -0.304 | -0.207 | -0.233 |
|                                                                                                                         | H4   | -0.160  | -0.730 | -0.094    | -0.178   | -0.206 | -0.304 | -0.207 | -0.234 |
|                                                                                                                         | C5   | -0.162  | -0.710 | -0.197    | -0.753   | -1.014 | -0.302 | -0.369 | -0.494 |
|                                                                                                                         | H6   | 0.003   | -0.001 | 0.040     | 0.159    | 0.210  | 0.004  | 0.074  | 0.100  |
|                                                                                                                         | H7   | 0.003   | -0.001 | 0.040     | 0.159    | 0.210  | 0.004  | 0.074  | 0.101  |
|                                                                                                                         | H8   | 0.003   | -0.001 | 0.040     | 0.159    | 0.210  | 0.004  | 0.074  | 0.102  |
| NH <sub>2</sub> SiH <sub>3</sub><br> | Si1  | 0.738   | 2.989  | 0.406     | 0.761    | 1.202  | 1.451  | 1.071  | 1.139  |
|                                                                                                                         | H2   | -0.156  | -0.728 | -0.093    | -0.158   | -0.223 | -0.298 | -0.229 | -0.241 |
|                                                                                                                         | H3   | -0.156  | -0.728 | -0.093    | -0.158   | -0.223 | -0.298 | -0.229 | -0.241 |
|                                                                                                                         | H4   | -0.171  | -0.742 | -0.107    | -0.175   | -0.244 | -0.348 | -0.270 | -0.290 |
|                                                                                                                         | N5   | -0.501  | -1.530 | -0.338    | -0.784   | -1.261 | -0.881 | -1.099 | -1.143 |
|                                                                                                                         | H6   | 0.123   | 0.369  | 0.113     | 0.257    | 0.374  | 0.187  | 0.377  | 0.388  |
|                                                                                                                         | H7   | 0.123   | 0.369  | 0.113     | 0.257    | 0.374  | 0.187  | 0.377  | 0.388  |
| SiH <sub>3</sub> OH                                                                                                     | Si1  | 0.823   | 3.009  | 0.440     | 0.771    | 1.310  | 1.553  | 1.045  | 1.142  |

|                                                                                   |                                                                                     |        |        |        |        |        |        |        |        |        |
|-----------------------------------------------------------------------------------|-------------------------------------------------------------------------------------|--------|--------|--------|--------|--------|--------|--------|--------|--------|
| 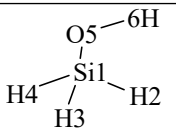 | H2                                                                                  | -0.158 | -0.733 | -0.096 | -0.173 | -0.248 | -0.324 | -0.242 | -0.269 |        |
|                                                                                   | H3                                                                                  | -0.141 | -0.720 | -0.084 | -0.148 | -0.229 | -0.284 | -0.200 | -0.220 |        |
|                                                                                   | H4                                                                                  | -0.158 | -0.733 | -0.096 | -0.173 | -0.248 | -0.324 | -0.242 | -0.269 |        |
|                                                                                   | O5                                                                                  | -0.597 | -1.413 | -0.342 | -0.556 | -1.057 | -0.942 | -0.793 | -0.812 |        |
|                                                                                   | H6                                                                                  | 0.231  | 0.590  | 0.178  | 0.279  | 0.473  | 0.320  | 0.431  | 0.427  |        |
| <hr/>                                                                             |                                                                                     |        |        |        |        |        |        |        |        |        |
| SiH <sub>3</sub> F                                                                | Si1                                                                                 | 0.913  | 3.017  | 0.478  | 0.823  | 1.379  | 1.613  | 1.003  | 1.140  |        |
|                                                                                   | F2                                                                                  | -0.508 | -0.862 | -0.228 | -0.335 | -0.644 | -0.731 | -0.391 | -0.421 |        |
|                                                                                   | H3                                                                                  | -0.135 | -0.719 | -0.084 | -0.163 | -0.245 | -0.294 | -0.204 | -0.240 |        |
|                                                                                   | H4                                                                                  | -0.135 | -0.719 | -0.084 | -0.163 | -0.245 | -0.294 | -0.204 | -0.240 |        |
|                                                                                   | H5                                                                                  | -0.135 | -0.719 | -0.084 | -0.163 | -0.245 | -0.294 | -0.204 | -0.240 |        |
| <hr/>                                                                             |                                                                                     |        |        |        |        |        |        |        |        |        |
| SiH <sub>3</sub> PH <sub>2</sub>                                                  | Si1                                                                                 | 0.528  | 2.713  | 0.280  | 0.550  | 0.684  | 1.039  | 0.769  | 0.875  |        |
|                                                                                   |    | H2     | -0.146 | -0.721 | -0.081 | -0.158 | -0.188 | -0.285 | -0.191 | -0.214 |
|                                                                                   |                                                                                     | H3     | -0.146 | -0.721 | -0.081 | -0.158 | -0.188 | -0.285 | -0.191 | -0.214 |
|                                                                                   |                                                                                     | H4     | -0.147 | -0.724 | -0.083 | -0.163 | -0.189 | -0.318 | -0.210 | -0.248 |
|                                                                                   | P5                                                                                  | 0.035  | 0.596  | 0.037  | 0.083  | -0.044 | 0.092  | -0.335 | -0.357 |        |
|                                                                                   | H6                                                                                  | -0.062 | -0.572 | -0.036 | -0.077 | -0.038 | -0.122 | 0.079  | 0.079  |        |
|                                                                                   | H7                                                                                  | -0.062 | -0.572 | -0.036 | -0.077 | -0.038 | -0.122 | 0.079  | 0.079  |        |
| <hr/>                                                                             |                                                                                     |        |        |        |        |        |        |        |        |        |
| SiH <sub>3</sub> SH                                                               | Si1                                                                                 | 0.622  | 2.839  | 0.344  | 0.593  | 0.848  | 1.251  | 0.722  | 0.811  |        |
|                                                                                   |  | H2     | -0.140 | -0.722 | -0.086 | -0.158 | -0.200 | -0.308 | -0.182 | -0.204 |
|                                                                                   |                                                                                     | H3     | -0.134 | -0.714 | -0.080 | -0.136 | -0.191 | -0.272 | -0.134 | -0.153 |
|                                                                                   |                                                                                     | H4     | -0.140 | -0.722 | -0.086 | -0.158 | -0.200 | -0.308 | -0.182 | -0.204 |
|                                                                                   |                                                                                     | H5     | 0.040  | -0.133 | 0.059  | 0.011  | 0.111  | 0.027  | 0.184  | 0.188  |
|                                                                                   |                                                                                     | S6     | -0.248 | -0.546 | -0.152 | -0.152 | -0.369 | -0.390 | -0.408 | -0.437 |
| <hr/>                                                                             |                                                                                     |        |        |        |        |        |        |        |        |        |
| SiH <sub>3</sub> Cl                                                               | Si1                                                                                 | 0.734  | 2.900  | 0.419  | 0.566  | 0.973  | 1.443  | 0.747  | 0.746  |        |
|                                                                                   | Cl2                                                                                 | -0.353 | -0.757 | -0.183 | -0.191 | -0.373 | -0.569 | -0.281 | -0.291 |        |
|                                                                                   | H3                                                                                  | -0.127 | -0.714 | -0.079 | -0.125 | -0.200 | -0.291 | -0.155 | -0.151 |        |
|                                                                                   | H4                                                                                  | -0.127 | -0.714 | -0.079 | -0.125 | -0.200 | -0.291 | -0.155 | -0.153 |        |
|                                                                                   | H5                                                                                  | -0.127 | -0.714 | -0.079 | -0.125 | -0.200 | -0.291 | -0.155 | -0.153 |        |
| <hr/>                                                                             |                                                                                     |        |        |        |        |        |        |        |        |        |
| SiH <sub>3</sub> Br                                                               | Si1                                                                                 | 0.670  | 2.858  | 0.428  | 0.740  | 0.889  | 1.364  | 0.644  | 0.844  |        |
|                                                                                   | H2                                                                                  | -0.118 | -0.713 | -0.072 | -0.155 | -0.193 | -0.292 | -0.133 | -0.182 |        |
|                                                                                   | H3                                                                                  | -0.118 | -0.713 | -0.072 | -0.155 | -0.193 | -0.292 | -0.133 | -0.181 |        |
|                                                                                   | H4                                                                                  | -0.118 | -0.713 | -0.072 | -0.155 | -0.193 | -0.292 | -0.133 | -0.182 |        |

|                     |     |        |        |        |        |        |        |        |        |
|---------------------|-----|--------|--------|--------|--------|--------|--------|--------|--------|
|                     | Br5 | -0.316 | -0.719 | -0.210 | -0.274 | -0.309 | -0.489 | -0.244 | -0.298 |
| SiH <sub>3</sub> Li | Si1 | 0.158  | 1.323  | -0.099 | 0.429  | -0.127 | 0.379  | -0.770 | -0.423 |
|                     | H2  | -0.201 | -0.737 | -0.121 | -0.231 | -0.190 | -0.311 | 0.039  | -0.042 |
|                     | H3  | -0.201 | -0.737 | -0.121 | -0.231 | -0.190 | -0.311 | 0.039  | -0.041 |
|                     | H4  | -0.201 | -0.737 | -0.121 | -0.231 | -0.190 | -0.311 | 0.039  | -0.048 |
|                     | Li5 | 0.445  | 0.888  | 0.461  | 0.263  | 0.698  | 0.553  | 0.654  | 0.553  |
| SiH <sub>3</sub> Na | Si1 | 0.152  | 1.469  | -0.107 | 0.292  | -0.090 | 0.449  | -0.600 | -0.175 |
|                     | H2  | -0.203 | -0.741 | -0.125 | -0.223 | -0.198 | -0.351 | -0.008 | -0.109 |
|                     | H3  | -0.203 | -0.741 | -0.125 | -0.223 | -0.198 | -0.351 | -0.008 | -0.108 |
|                     | H4  | -0.203 | -0.741 | -0.125 | -0.223 | -0.198 | -0.351 | -0.008 | -0.111 |
|                     | Na5 | 0.457  | 0.754  | 0.482  | 0.378  | 0.686  | 0.603  | 0.624  | 0.502  |
| SiH <sub>3</sub> K  | Si1 | 0.063  | 1.472  | -0.151 | 0.058  | -0.175 | 0.387  | -0.329 | -0.479 |
|                     | H2  | -0.215 | -0.756 | -0.136 | -0.229 | -0.209 | -0.372 | -0.110 | -0.056 |
|                     | H3  | -0.215 | -0.756 | -0.136 | -0.229 | -0.209 | -0.372 | -0.110 | -0.057 |
|                     | H4  | -0.215 | -0.756 | -0.136 | -0.229 | -0.209 | -0.372 | -0.110 | -0.058 |
|                     | K5  | 0.582  | 0.797  | 0.559  | 0.629  | 0.800  | 0.728  | 0.658  | 0.650  |
| PH <sub>3</sub>     | P1  | 0.153  | 1.689  | 0.119  | 0.227  | 0.149  | 0.390  | -0.185 | -0.189 |
|                     | H2  | -0.051 | -0.563 | -0.040 | -0.076 | -0.050 | -0.130 | 0.062  | 0.064  |
|                     | H3  | -0.051 | -0.563 | -0.040 | -0.076 | -0.050 | -0.130 | 0.062  | 0.063  |
|                     | H4  | -0.051 | -0.563 | -0.040 | -0.076 | -0.050 | -0.130 | 0.062  | 0.063  |
|                     | B1  | 0.237  | 1.633  | 0.097  | -0.093 | 0.117  | 0.467  | 0.441  | 0.318  |
|                     | H2  | -0.117 | -0.658 | -0.066 | -0.025 | -0.085 | -0.156 | -0.164 | -0.114 |
|                     | H3  | -0.117 | -0.658 | -0.066 | -0.025 | -0.085 | -0.156 | -0.164 | -0.114 |
|                     | P4  | 0.087  | 0.821  | 0.081  | 0.245  | 0.086  | -0.025 | -0.276 | -0.267 |
|                     | H5  | -0.045 | -0.569 | -0.023 | -0.051 | -0.017 | -0.065 | 0.082  | 0.088  |
|                     | H6  | -0.045 | -0.569 | -0.023 | -0.051 | -0.017 | -0.065 | 0.081  | 0.088  |
|                     | C1  | -0.073 | -0.528 | -0.166 | -0.595 | -0.834 | -0.092 | 0.236  | 0.875  |
|                     | P2  | 0.178  | 1.722  | 0.135  | 0.332  | 0.388  | 0.440  | -0.321 | -0.214 |
|                     | H3  | 0.007  | 0.000  | 0.041  | 0.145  | 0.195  | -0.034 | -0.057 | -0.214 |
|                     | H4  | 0.008  | 0.001  | 0.043  | 0.149  | 0.197  | 0.001  | -0.018 | -0.248 |
|                     | H5  | 0.008  | 0.001  | 0.043  | 0.149  | 0.197  | 0.001  | -0.018 | -0.357 |
|                     | H6  | -0.064 | -0.598 | -0.048 | -0.090 | -0.071 | -0.159 | 0.088  | 0.079  |

|                                  |     |        |        |        |        |        |        |        |        |
|----------------------------------|-----|--------|--------|--------|--------|--------|--------|--------|--------|
|                                  | H7  | -0.064 | -0.598 | -0.048 | -0.090 | -0.071 | -0.159 | 0.088  | 0.079  |
| NH <sub>2</sub> PH <sub>2</sub>  | H1  | -0.068 | -0.609 | -0.050 | -0.008 | -0.092 | -0.171 | 0.086  | 0.106  |
|                                  | H2  | -0.084 | -0.620 | -0.063 | -0.034 | -0.112 | -0.218 | 0.083  | 0.075  |
|                                  | N3  | -0.420 | -1.438 | -0.316 | -0.557 | -1.130 | -0.729 | -0.691 | -0.746 |
|                                  | H4  | 0.125  | 0.368  | 0.117  | 0.257  | 0.363  | 0.165  | 0.321  | 0.332  |
|                                  | H5  | 0.126  | 0.372  | 0.116  | 0.258  | 0.366  | 0.184  | 0.327  | 0.357  |
|                                  | P6  | 0.321  | 1.927  | 0.195  | 0.085  | 0.605  | 0.770  | -0.125 | -0.124 |
| PH <sub>2</sub> OH               | H1  | -0.059 | -0.604 | -0.045 | -0.031 | -0.102 | -0.168 | 0.102  | 0.119  |
|                                  | H2  | -0.059 | -0.604 | -0.045 | -0.031 | -0.102 | -0.167 | 0.102  | 0.120  |
|                                  | O3  | -0.526 | -1.312 | -0.317 | -0.413 | -0.949 | -0.790 | -0.526 | -0.569 |
|                                  | H4  | 0.228  | 0.583  | 0.174  | 0.283  | 0.462  | 0.301  | 0.415  | 0.454  |
|                                  | P5  | 0.416  | 1.936  | 0.234  | 0.192  | 0.690  | 0.824  | -0.093 | -0.124 |
| PH <sub>2</sub> F                | P1  | 0.544  | 1.983  | 0.297  | 0.359  | 0.812  | 0.975  | 0.032  | 0.033  |
|                                  | F2  | -0.450 | -0.789 | -0.216 | -0.252 | -0.581 | -0.653 | -0.198 | -0.196 |
|                                  | H3  | -0.047 | -0.597 | -0.041 | -0.053 | -0.116 | -0.161 | 0.083  | 0.081  |
|                                  | H4  | -0.047 | -0.597 | -0.041 | -0.053 | -0.116 | -0.161 | 0.083  | 0.081  |
| SiH <sub>3</sub> PH <sub>2</sub> | Si1 | 0.528  | 2.713  | 0.280  | 0.550  | 0.684  | 1.039  | 0.769  | 0.875  |
|                                  | H2  | -0.146 | -0.721 | -0.081 | -0.158 | -0.188 | -0.285 | -0.191 | -0.214 |
|                                  | H3  | -0.146 | -0.721 | -0.081 | -0.158 | -0.188 | -0.285 | -0.191 | -0.214 |
|                                  | H4  | -0.147 | -0.724 | -0.083 | -0.163 | -0.189 | -0.318 | -0.210 | -0.248 |
|                                  | P5  | 0.035  | 0.596  | 0.037  | 0.083  | -0.044 | 0.092  | -0.335 | -0.357 |
|                                  | H6  | -0.062 | -0.572 | -0.036 | -0.077 | -0.038 | -0.122 | 0.079  | 0.079  |
|                                  | H7  | -0.062 | -0.572 | -0.036 | -0.077 | -0.038 | -0.122 | 0.079  | 0.079  |
| PH <sub>2</sub> SH               | H1  | -0.050 | -0.589 | -0.039 | -0.059 | -0.061 | -0.138 | 0.108  | 0.124  |
|                                  | H2  | -0.050 | -0.589 | -0.039 | -0.059 | -0.061 | -0.138 | 0.108  | 0.124  |
|                                  | H3  | 0.046  | -0.123 | 0.059  | 0.022  | 0.104  | 0.033  | 0.181  | 0.211  |
|                                  | P4  | 0.231  | 1.475  | 0.140  | 0.226  | 0.276  | 0.509  | -0.148 | -0.179 |
|                                  | S5  | -0.177 | -0.174 | -0.121 | -0.130 | -0.257 | -0.266 | -0.249 | -0.279 |
| PH <sub>2</sub> Cl               | P1  | 0.337  | 1.698  | 0.241  | 0.182  | 0.445  | 0.748  | -0.018 | -0.015 |
|                                  | Cl2 | -0.270 | -0.529 | -0.177 | -0.132 | -0.302 | -0.466 | -0.164 | -0.166 |
|                                  | H3  | -0.033 | -0.584 | -0.032 | -0.025 | -0.071 | -0.141 | 0.091  | 0.090  |
|                                  | H4  | -0.033 | -0.584 | -0.032 | -0.025 | -0.071 | -0.141 | 0.091  | 0.091  |



|                    |       |        |        |        |        |        |        |        |        |
|--------------------|-------|--------|--------|--------|--------|--------|--------|--------|--------|
| PH <sub>2</sub> Br | H1    | -0.028 | -0.580 | -0.023 | -0.084 | -0.065 | -0.138 | 0.087  | 0.092  |
|                    | H2    | -0.028 | -0.580 | -0.023 | -0.084 | -0.065 | -0.138 | 0.087  | 0.092  |
|                    | P3    | 0.266  | 1.542  | 0.260  | 0.432  | 0.361  | 0.659  | -0.031 | -0.032 |
|                    | Br4   | -0.210 | -0.383 | -0.215 | -0.265 | -0.232 | -0.383 | -0.144 | -0.152 |
| LiPH <sub>2</sub>  | H1    | -0.122 | -0.600 | -0.079 | -0.154 | -0.053 | -0.158 | 0.018  | 0.023  |
|                    | H2    | -0.122 | -0.600 | -0.079 | -0.154 | -0.053 | -0.158 | 0.018  | 0.023  |
|                    | Li3   | 0.514  | 0.895  | 0.468  | 0.271  | 0.749  | 0.599  | 0.635  | 0.632  |
|                    | P4    | -0.270 | 0.305  | -0.311 | 0.037  | -0.642 | -0.283 | -0.672 | -0.678 |
| NaPH <sub>2</sub>  | H1    | -0.128 | -0.614 | -0.087 | -0.166 | -0.068 | -0.169 | 0.022  | 0.025  |
|                    | H2    | -0.128 | -0.614 | -0.087 | -0.166 | -0.068 | -0.169 | 0.022  | 0.025  |
|                    | P3    | -0.255 | 0.465  | -0.327 | -0.074 | -0.597 | -0.286 | -0.681 | -0.677 |
|                    | Na4   | 0.511  | 0.765  | 0.502  | 0.407  | 0.733  | 0.624  | 0.638  | 0.628  |
| KPH <sub>2</sub>   | H1    | -0.133 | -0.633 | -0.099 | -0.175 | -0.080 | -0.190 | 0.025  | 0.033  |
|                    | H2    | -0.133 | -0.633 | -0.099 | -0.175 | -0.080 | -0.190 | 0.025  | 0.033  |
|                    | P3    | -0.361 | 0.468  | -0.376 | -0.369 | -0.672 | -0.353 | -0.784 | -0.784 |
|                    | K4    | 0.627  | 0.800  | 0.575  | 0.719  | 0.832  | 0.733  | 0.735  | 0.717  |
| H <sub>2</sub> S   | S1    | -0.102 | 0.226  | -0.108 | -0.049 | -0.205 | -0.064 | -0.283 | -0.315 |
|                    | H2    | 0.051  | -0.113 | 0.054  | 0.025  | 0.102  | 0.032  | 0.142  | 0.158  |
|                    | H3    | 0.051  | -0.113 | 0.054  | 0.025  | 0.102  | 0.032  | 0.142  | 0.158  |
| BH <sub>2</sub> SH | B1    | 0.306  | 1.919  | 0.130  | -0.094 | 0.168  | 0.571  | 0.381  | 0.276  |
|                    | S3-H2 | 0.055  | -0.120 | 0.066  | 0.025  | 0.106  | 0.022  | 0.176  | 0.178  |
|                    | H5    | -0.133 | -0.478 | -0.050 | 0.108  | -0.107 | -0.275 | -0.274 | -0.259 |
|                    | H4    | -0.115 | -0.662 | -0.073 | -0.028 | -0.084 | -0.158 | -0.161 | -0.121 |
|                    | H5    | -0.113 | -0.660 | -0.073 | -0.012 | -0.083 | -0.160 | -0.121 | -0.075 |
| CH <sub>3</sub> SH | C1    | 0.012  | -0.066 | -0.087 | -0.504 | -0.654 | 0.142  | 0.049  | 0.811  |
|                    | S2-H3 | -0.118 | 0.277  | -0.089 | 0.055  | -0.009 | -0.090 | -0.369 | -0.204 |
|                    | H3    | 0.044  | -0.288 | 0.047  | 0.005  | 0.086  | 0.000  | 0.202  | -0.153 |
|                    | H4    | 0.017  | 0.020  | 0.039  | 0.142  | 0.188  | -0.032 | 0.016  | -0.204 |
|                    | H5    | 0.028  | 0.038  | 0.051  | 0.159  | 0.202  | 0.012  | 0.086  | 0.188  |
|                    | H6    | 0.017  | 0.019  | 0.039  | 0.142  | 0.188  | -0.032 | 0.016  | -0.437 |
| NH <sub>2</sub> SH | H1    | 0.132  | 0.367  | 0.109  | 0.254  | 0.351  | 0.157  | 0.371  | 0.397  |
|                    | H2    | 0.132  | 0.367  | 0.109  | 0.254  | 0.351  | 0.157  | 0.371  | 0.397  |

|                    |     |        |        |        |        |        |        |        |        |        |
|--------------------|-----|--------|--------|--------|--------|--------|--------|--------|--------|--------|
|                    | H3  | 0.046  | -0.121 | 0.045  | 0.042  | 0.075  | -0.003 | 0.177  | 0.207  |        |
|                    | S4  | 0.026  | 0.523  | -0.017 | -0.011 | 0.174  | 0.147  | -0.131 | -0.155 |        |
|                    | N5  | -0.336 | -1.135 | -0.247 | -0.538 | -0.951 | -0.458 | -0.788 | -0.844 |        |
| SHOH               | H1  | 0.046  | -0.108 | 0.048  | 0.029  | 0.056  | -0.013 | 0.152  | 0.164  |        |
|                    |     | S2     | 0.168  | 0.622  | 0.041  | 0.068  | 0.305  | 0.316  | -0.060 | -0.074 |
|                    |     | O3     | -0.457 | -1.092 | -0.256 | -0.369 | -0.814 | -0.576 | -0.467 | -0.480 |
| HSF                | H4  | 0.243  | 0.578  | 0.168  | 0.272  | 0.454  | 0.273  | 0.375  | 0.390  |        |
|                    | H1  | 0.063  | -0.066 | 0.064  | 0.041  | 0.060  | 0.028  | 0.163  | 0.181  |        |
|                    | S2  | 0.296  | 0.684  | 0.100  | 0.174  | 0.417  | 0.472  | 0.037  | 0.008  |        |
| F3                 | F3  | -0.359 | -0.618 | -0.165 | -0.215 | -0.477 | -0.499 | -0.200 | -0.188 |        |
|                    | Si1 | 0.622  | 2.839  | 0.344  | 0.593  | 0.848  | 1.251  | 0.722  | 0.811  |        |
|                    |     | H2     | -0.140 | -0.722 | -0.086 | -0.158 | -0.200 | -0.308 | -0.182 | -0.204 |
| H3                 |     | -0.134 | -0.714 | -0.080 | -0.136 | -0.191 | -0.272 | -0.134 | -0.153 |        |
| H4                 |     | -0.140 | -0.722 | -0.086 | -0.158 | -0.200 | -0.308 | -0.182 | -0.204 |        |
| H5                 |     | 0.040  | -0.133 | 0.059  | 0.011  | 0.111  | 0.027  | 0.184  | 0.188  |        |
| S6                 |     | -0.248 | -0.546 | -0.152 | -0.152 | -0.369 | -0.390 | -0.408 | -0.437 |        |
| PH <sub>2</sub> SH | H1  | -0.050 | -0.589 | -0.039 | -0.059 | -0.061 | -0.138 | 0.108  | 0.124  |        |
|                    |     | H2     | -0.050 | -0.589 | -0.039 | -0.059 | -0.061 | -0.138 | 0.108  | 0.124  |
|                    |     | H3     | 0.046  | -0.123 | 0.059  | 0.022  | 0.104  | 0.033  | 0.181  | 0.211  |
|                    | P4  | 0.231  | 1.475  | 0.140  | 0.226  | 0.276  | 0.509  | -0.148 | -0.179 |        |
|                    | S5  | -0.177 | -0.174 | -0.121 | -0.130 | -0.257 | -0.266 | -0.249 | -0.279 |        |
| HSCl               | H1  | 0.078  | -0.064 | 0.065  | 0.026  | 0.093  | 0.025  | 0.162  | 0.180  |        |
|                    | S2  | 0.056  | 0.292  | 0.041  | 0.034  | 0.061  | 0.221  | -0.070 | -0.089 |        |
|                    | Cl3 | -0.134 | -0.228 | -0.106 | -0.061 | -0.154 | -0.246 | -0.092 | -0.092 |        |
| HSBr               | H1  | 0.076  | -0.064 | 0.074  | 0.024  | 0.099  | 0.027  | 0.159  | 0.181  |        |
|                    | S2  | 0.007  | 0.169  | 0.060  | 0.115  | -0.032 | 0.125  | -0.100 | -0.115 |        |
|                    | Br3 | -0.083 | -0.105 | -0.134 | -0.140 | -0.068 | -0.152 | -0.059 | -0.066 |        |
| LiSH               | H1  | -0.025 | -0.251 | 0.009  | -0.027 | 0.090  | -0.024 | 0.088  | 0.117  |        |
|                    | Li2 | 0.594  | 0.916  | 0.488  | 0.373  | 0.814  | 0.717  | 0.697  | 0.703  |        |
|                    | S3  | -0.569 | -0.665 | -0.497 | -0.346 | -0.904 | -0.693 | -0.785 | -0.819 |        |
| NaSH               | H1  | -0.031 | -0.278 | -0.007 | -0.042 | 0.076  | -0.044 | 0.084  | 0.115  |        |
|                    | S2  | -0.580 | -0.584 | -0.552 | -0.496 | -0.938 | -0.720 | -0.841 | -0.869 |        |

---

|     |     |        |        |        |        |        |        |        |        |
|-----|-----|--------|--------|--------|--------|--------|--------|--------|--------|
|     | Na3 | 0.611  | 0.862  | 0.560  | 0.538  | 0.862  | 0.763  | 0.757  | 0.754  |
| KSH | H1  | -0.049 | -0.316 | -0.015 | -0.042 | 0.071  | -0.044 | 0.090  | 0.126  |
|     | S2  | -0.665 | -0.554 | -0.582 | -0.721 | -0.989 | -0.804 | -0.908 | -0.933 |
|     | K3  | 0.714  | 0.870  | 0.597  | 0.763  | 0.918  | 0.848  | 0.818  | 0.807  |

---
